# Supplementary material for: Severity of COVID-19 among Hospitalized Patients: Omicron Remains a Severe Threat for Immunocompromised Hosts
Source: MDPI journal article supplement (doi:10.3390/v14122736), 2022-12-08
Supplement: s1 [file s1]

## Title

Severity of COVID-19 among hospitalized patients: Omicron remains a severe threat for immunocompromised hosts

## Authors:

Louis Nevejan<sup>1,#</sup>, Sien Ombelet<sup>1,2</sup>, Lies Laenen<sup>1,2</sup>, Els Keyaerts<sup>2</sup>, Thomas Demuyser<sup>3,4</sup>, Lucie Seyler<sup>5</sup>, Oriane Soetens<sup>3</sup>, Els Van Nedervelde<sup>5</sup>, Reinout Naesens<sup>6</sup>, Dieter Geysels<sup>6</sup>, Walter Verstrepen<sup>6</sup>, Lien Cattoir<sup>7</sup>, Steven Martens<sup>7</sup>, Charlotte Michel<sup>8</sup>, Elise Mathieu<sup>8</sup>, Marijke Reynders<sup>9</sup>, Anton Evenepoel<sup>9</sup>, Jorn Hellemans<sup>9</sup>, Merijn Vanhee<sup>9</sup>, Koen Magerman<sup>10</sup>, Justine Maes<sup>10</sup>, Veerle Matheeussen<sup>11</sup>, H  l  ne Boogaerts<sup>11</sup>, Katrien Lagrou<sup>1,2</sup>, Lize Cuypers<sup>1,2,#,\*</sup> & Emmanuel Andr  <sup>1,2,#,\*</sup>

# corresponding authors - \* shared last authorship

Louis Nevejan: - Lize Cuypers: lize.cuypers@uzleuven.be - Emmanuel Andre: Emmanuel.andre@uzleuven.be

Department of Laboratory Medicine, National Reference Center for Respiratory Pathogens, UZ Leuven –

University Hospitals Leuven

Herestraat 49, 3000 Leuven – BELGIUM

## Supplemental Table & Figures

**Supplemental Table S1.** Clinical summary of newly hospitalized adult patients (≥18 years old) with positive SARS-CoV-2 screening result.

|                            |                                                                    | All patients<br>N = 1291 | COVID-19 outcomes                                                 |                                                     |                                                               |
|----------------------------|--------------------------------------------------------------------|--------------------------|-------------------------------------------------------------------|-----------------------------------------------------|---------------------------------------------------------------|
|                            |                                                                    |                          | Moderate/severe/<br>critical/fatal<br>COVID-19<br>N = 538 (41.7%) | ICU admission<br>due to COVID-19<br>N = 129 (10.0%) | In-hospital mortality<br>related to COVID-19<br>N = 99 (7.7%) |
| Patient characteristics    |                                                                    |                          |                                                                   |                                                     |                                                               |
|                            | Age (years); median (IQR)                                          | 69 (50-83)               | 70 (59-82)                                                        | 63 (53-72)                                          | 78 (68-86)                                                    |
|                            | Male; n (%)                                                        | 619 (47.9%)              | 310 (57.6%)                                                       | 83 (64.3%)                                          | 63 (63.6%)                                                    |
|                            | Immunocompromised; n (%)                                           | 286 (22.2%)              | 157 (29.2%)                                                       | 51 (39.5%)                                          | 39 (39.4%)                                                    |
| SARS-CoV-2 screening       |                                                                    |                          |                                                                   |                                                     |                                                               |
|                            | Omicron variant, n (%)                                             | 905 (70.1%)              | 323 (60.0%)                                                       | 68 (52.7%)                                          | 58 (58.6%)                                                    |
|                            | Omicron BA.1 variant, n (%)                                        | 538 (41.7%)              | 294 (54.6%)                                                       | 43 (33.3%)                                          | 31 (31.3%)                                                    |
|                            | Omicron BA.2 variant, n (%)                                        | 34 (2.6%)                | 14 (2.6%)                                                         | 0 (0.0%)                                            | 1 (1.0%)                                                      |
|                            | Delta variant, n (%)                                               | 166 (12.9%)              | 126 (23.4%)                                                       | 44 (34.1%)                                          | 31 (31.3%)                                                    |
|                            | Untyped, n (%)                                                     | 220 (17.0%)              | 89 (16.5%)                                                        | 17 (13.2%)                                          | 10 (10.1%)                                                    |
| Serology data at admission |                                                                    |                          |                                                                   |                                                     |                                                               |
|                            | IgG anti-N available, n (%)                                        | 117 (9.1%)               | 62 (11.5%)                                                        | 20 (15.5%)                                          | 15 (15.2%)                                                    |
|                            | Positive IgG anti-N; n (%)                                         | 15/117 (12.8%)           | 9/62 (28.1%)                                                      | 2/20 (10.0%)                                        | 3/15 (20.0%)                                                  |
|                            | IgG anti-S available, n (%)                                        | 194 (15.3%)              | 100 (18.6%)                                                       | 36 (27.9%)                                          | 24 (24.2%)                                                    |
|                            | Positive IgG anti-S; n (%)                                         | 142/194 (73.2%)          | 61/100 (61.0%)                                                    | 19/36 (52.8%)                                       | 17/24 (70.8%)                                                 |
| Hospitalization data       |                                                                    |                          |                                                                   |                                                     |                                                               |
|                            | Hospital length-of-stay non-deceased patients (days); median (IQR) | 8 (3-18)                 | 8 (5-18)                                                          | 22 (12-51)                                          |                                                               |
|                            | Hospital length-of-stay deceased patients (days); median (IQR)     | 20 (7-27)                | 13 (6-25)                                                         | 19 (12-32)                                          | 13 (6-25)                                                     |
|                            | ICU admission; n (%)                                               | 178 (13.8%)              |                                                                   |                                                     |                                                               |
|                            | Deceased in hospital; n (%)                                        | 139 (10.8%)              |                                                                   |                                                     |                                                               |
| Vaccination status         |                                                                    |                          |                                                                   |                                                     |                                                               |
|                            | Vaccination status unknown; n (%)                                  | 120 (9.3%)               | 52 (9.7%)                                                         | 6 (4.7%)                                            | 30 (30.3%)                                                    |
|                            | Unvaccinated; n (%)                                                | 221 (17.2%)              | 112 (22.7%)                                                       | 34 (26.4%)                                          | 14 (14.1%)                                                    |
|                            | ½ basic vaccination; n (%)                                         | 15 (1.2%)                | 6 (1.2%)                                                          | 0 (0.0%)                                            | 1 (0.1%)                                                      |
|                            | Basic vaccination; n (%)                                           | 263 (20.4%)              | 104 (19.3%)                                                       | 34 (26.4%)                                          | 14 (14.1%)                                                    |
|                            | Boosted; n (%)                                                     | 672 (52.1%)              | 264 (49.1%)                                                       | 55 (42.6%)                                          | 40 (40.4%)                                                    |
|                            | Type of vaccines available; n (%)                                  | 892 (69.1%)              | 351 (80.1%)                                                       | 82 (63.6%)                                          | 40 (40.4%)                                                    |
|                            | Viral vector vaccinated; n (%)                                     | 262/892 (29.4%)          | 119/351 (33.9%)                                                   | 32/82 (39.0%)                                       | 14/40 (35.0%)                                                 |
|                            | Time since last vaccination available; n [%]                       | 870 (67.4%)              | 337 (62.6%)                                                       | 73 (56.6%)                                          | 31 (31.3%)                                                    |
|                            | Vaccinated <2 months before admission; n [%]                       | 215/870 (24.7%)          | 62/337 (18.4%)                                                    | 13/73 (17.8%)                                       | 5/31 (16.1%)                                                  |
|                            | Vaccinated <4 months before admission; n [%]                       | 486/870 (55.9%)          | 218/337 (64.7%)                                                   | 43/73 (58.9%)                                       | 23/31 (74.2%)                                                 |
|                            | Vaccinated <6 months before admission; n [%]                       | 739/870 (84.9%)          | 283/337 (84.0%)                                                   | 61/73 (83.6%)                                       | 27/31 (87.1%)                                                 |
| SARS-CoV-2 reinfection     |                                                                    |                          |                                                                   |                                                     |                                                               |
|                            | Documented previous infection; n [IQR]                             | 17 (1.3%)                | 4 (0.7%)                                                          | 1 (0.8%)                                            | 1 (1.0%)                                                      |

**Supplemental Table S2.** Clinical summary of newly hospitalized children (<18 years old) with positive SARS-CoV-2 screening result.

|                            |                                                                    | All patients<br>N = 210 | COVID-19 outcomes                                                |                                           |                                                              |
|----------------------------|--------------------------------------------------------------------|-------------------------|------------------------------------------------------------------|-------------------------------------------|--------------------------------------------------------------|
|                            |                                                                    |                         | Moderate/severe/<br>critical/MIS-C<br>COVID-19<br>N = 50 (23.8%) | ICU admission<br>due to COVID-19<br>N = 8 | In-hospital mortality<br>related to COVID-19<br>N = 0 (0.0%) |
| Patient characteristics    |                                                                    |                         |                                                                  |                                           |                                                              |
|                            | Age (years); median (IQR)                                          | 1 (1-6)                 | 1 (1-5)                                                          | 1 (1-1)                                   |                                                              |
|                            | Male; n (%)                                                        | 128 (60.1%)             | 18 (36.0%)                                                       | 6 (75.0%)                                 |                                                              |
|                            | Immunocompromised; n (%)                                           | 23 (10.1%)              | 4 (8.0%)                                                         | 1 (12.5%)                                 |                                                              |
| SARS-CoV-2 screening       |                                                                    |                         |                                                                  |                                           |                                                              |
|                            | Omicron variant, n (%)                                             | 125 (59.5%)             | 22 (44.0%)                                                       | 3 (37.5%)                                 |                                                              |
|                            | Omicron BA.1 variant, n (%)                                        | 83 (39.5%)              | 22 (44.0%)                                                       | 2 (25.0%)                                 |                                                              |
|                            | Omicron BA.2 variant, n (%)                                        | 6 (2.9%)                | 0 (0.0%)                                                         | 0 (0.0%)                                  |                                                              |
|                            | Delta variant, n (%)                                               | 21 (10.0%)              | 2 (4.0%)                                                         | 1 (12.5%)                                 |                                                              |
|                            | Untyped, n (%)                                                     | 58 (27.6%)              | 26 (52.0%)                                                       | 4 (50.0%)                                 |                                                              |
| Serology data at admission |                                                                    |                         |                                                                  |                                           |                                                              |
|                            | IgG anti-N available, n (%)                                        | 6 (2.9%)                | 2 (4.0%)                                                         | 0 (0.0%)                                  |                                                              |
|                            | Positive IgG anti-N; n (%)                                         | 3/6 (50.0%)             | 2/2 (100.0%)                                                     |                                           |                                                              |
|                            | IgG anti-S available, n (%)                                        | 4 (1.9%)                | 1 (2.0%)                                                         | 0 (0.0%)                                  |                                                              |
|                            | Positive IgG anti-S; n (%)                                         | 4/4 (100.0%)            | 1/1 (100.0%)                                                     |                                           |                                                              |
| Hospitalization data       |                                                                    |                         |                                                                  |                                           |                                                              |
|                            | Hospital length-of-stay non-deceased patients (days); median (IQR) | 3 (2-5)                 | 4.5 (2-7)                                                        | 21 (10-35)                                |                                                              |
|                            | ICU admission; n (%)                                               | 20 (9.5%)               |                                                                  |                                           |                                                              |
|                            | Deceased in hospital; n (%)                                        | 0 (0.0%)                |                                                                  |                                           |                                                              |
| Vaccination status         |                                                                    |                         |                                                                  |                                           |                                                              |
|                            | Vaccination status unknown; n (%)                                  | 12 (5.7%)               | 7 (14.0%)                                                        | 3 (37.5%)                                 |                                                              |
|                            | Unvaccinated; n (%)                                                | 186 (88.6%)             | 43 (86.0%)                                                       | 5 (62.5%)                                 |                                                              |
|                            | ½ basic vaccination; n (%)                                         | 3 (1.4%)                | 0 (0.0%)                                                         |                                           |                                                              |
|                            | Basic vaccination; n (%)                                           | 6 (2.9%)                | 0 (0.0%)                                                         |                                           |                                                              |
|                            | Boosted; n (%)                                                     | 3 (1.4%)                | 0 (0.0%)                                                         |                                           |                                                              |
|                            | Type of vaccines available; n (%)                                  | 12 (5.7%)               |                                                                  |                                           |                                                              |
|                            | Viral vector vaccinated; n (%)                                     | 0/12 (0.0%)             |                                                                  |                                           |                                                              |
|                            | Time since last vaccination available; n [%]                       | 12 (5.7%)               |                                                                  |                                           |                                                              |
|                            | Vaccinated <2 months before admission; n [%]                       | 3/12 (25.0%)            |                                                                  |                                           |                                                              |
| SARS-CoV-2 reinfection     |                                                                    |                         |                                                                  |                                           |                                                              |
|                            | Documented previous infection; n [IQR]                             | 0 (0.0%)                |                                                                  |                                           |                                                              |

**Supplemental Table S3. Mixed-model logistic regression analysis in adult patients infected with Delta (n=166).**

Covariates: 1. odds increase per year; 2. versus female; 3. versus non-immunocompromised; 4. versus any vaccination; 5. versus unvaccinated or (1/2) basic vaccination; 6. versus vaccinated with mRNA solely. 7. versus unvaccinated or vaccinated >2/>4/>6 months before admission. Abbreviations: OR, odds ratio; CI; confidence interval.

|                                                                                                             | Crude OR | 95% CI     | p value      | Adjusted OR | 95% CI    | p value      |
|-------------------------------------------------------------------------------------------------------------|----------|------------|--------------|-------------|-----------|--------------|
| <b>Outcome 1 – disease severity: odds of moderate/severe/critical/fatal COVID-19 (n=126/166, 75.9%)</b>     |          |            |              |             |           |              |
| Age at admission <sup>1</sup>                                                                               | 1.02     | 1.00-1.04  | 0.10         | 1.01        | 0.99-1.04 | 0.16         |
| Male <sup>2</sup>                                                                                           | 1.63     | 0.80-3.37  | 0.18         | 1.50        | 0.72-3.14 | 0.28         |
| Immunocompromised <sup>3</sup>                                                                              | 1.12     | 0.52-2.51  | 0.77         | 1.01        | 0.45-2.32 | 0.97         |
| Unvaccinated <sup>4</sup>                                                                                   | 1.36     | 0.62-3.13  | 0.46         | -           | -         | -            |
| Boosted <sup>5</sup>                                                                                        | 0.84     | 0.38-1.91  | 0.67         | -           | -         | -            |
| Viral vector vaccination <sup>6</sup>                                                                       | 1.93     | 0.67-6.43  | 0.25         | -           | -         | -            |
| Vaccinated <2 months before admission <sup>7</sup>                                                          | 1.17     | 0.32-5.64  | 0.82         | -           | -         | -            |
| Vaccinated <4 months before admission <sup>7</sup>                                                          | 0.48     | 0.16-1.34  | 0.18         | -           | -         | -            |
| Vaccinated <6 months before admission <sup>7</sup>                                                          | 0.40     | 0.09-1.37  | 0.18         | -           | -         | -            |
| <b>Outcome 2 – ICU admission: odds of admission or transferred to ICU due to COVID-19 (n=44/166, 26.5%)</b> |          |            |              |             |           |              |
| Age at admission <sup>1</sup>                                                                               | 0.99     | 0.98-1.01  | 0.59         | 0.99        | 0.97-1.10 | 0.36         |
| Male <sup>2</sup>                                                                                           | 2.23     | 1.09-4.78  | <b>0.03</b>  | 2.37        | 1.14-5.16 | <b>0.02</b>  |
| Immunocompromised <sup>3</sup>                                                                              | 0.99     | 0.47-2.06  | 0.99         | 1.05        | 0.42-2.31 | 0.91         |
| Unvaccinated <sup>4</sup>                                                                                   | 1.44     | 0.69-2.97  | 0.32         | -           | -         | -            |
| Boosted <sup>5</sup>                                                                                        | 0.61     | 0.26-1.33  | 0.23         | -           | -         | -            |
| Viral vector vaccination <sup>6</sup>                                                                       | 2.53     | 0.91-7.02  | 0.07         | -           | -         | -            |
| Vaccinated <2 months before admission <sup>7</sup>                                                          | 0.27     | 0.01-1.55  | 0.23         | -           | -         | -            |
| Vaccinated <4 months before admission <sup>7</sup>                                                          | 0.44     | 0.15-1.25  | 0.12         | -           | -         | -            |
| Vaccinated <6 months before admission <sup>7</sup>                                                          | 0.80     | 0.26-2.80  | 0.71         | -           | -         | -            |
| <b>Outcome 3 – mortality: odds of in-hospital mortality related to COVID-19 (n=31/166, 18.7%)</b>           |          |            |              |             |           |              |
| Age at admission <sup>1</sup>                                                                               | 1.04     | 1.02-1.08  | <b>0.002</b> | 1.04        | 1.01-1.08 | <b>0.005</b> |
| Male <sup>2</sup>                                                                                           | 1.47     | 0.66-3.44  | 0.35         | 1.34        | 0.59-3.15 | 0.49         |
| Immunocompromised <sup>3</sup>                                                                              | 2.46     | 1.08-5.78  | <b>0.03</b>  | 2.12        | 0.92-4.87 | 0.07         |
| Unvaccinated <sup>4</sup>                                                                                   | 0.95     | 0.36-2.36  | 0.92         | -           | -         | -            |
| Boosted <sup>5</sup>                                                                                        | 2.44     | 0.97-6.07  | <b>0.05</b>  | -           | -         | -            |
| Viral vector vaccination <sup>6</sup>                                                                       | 1.53     | 0.36-5.85  | 0.54         | -           | -         | -            |
| Vaccinated <2 months before admission <sup>7</sup>                                                          | 2.47     | 0.33-13.16 | 0.31         | -           | -         | -            |
| Vaccinated <4 months before admission <sup>7</sup>                                                          | 4.30     | 0.69-83.33 | 0.19         | -           | -         | -            |
| Vaccinated <6 months before admission <sup>7</sup>                                                          | NA       | NA         | 0.99         | -           | -         | -            |

**Supplemental Table S4. Mixed-model logistic regression analysis adult patients infected with Omicron (n=905).**

Covariates: 1. odds increase per year; 2. versus female; 3. versus non-immunocompromised; 4. versus any vaccination; 5. versus unvaccinated or (1/2) basic vaccination; 6. versus vaccinated with mRNA solely. 7. versus unvaccinated or vaccinated >2/>4/>6 months before admission. Abbreviations: OR, odds ratio; CI; confidence interval.

|                                                                                                              | Crude OR | 95% CI    | p value          | Adjusted OR | 95% CI    | p value          |
|--------------------------------------------------------------------------------------------------------------|----------|-----------|------------------|-------------|-----------|------------------|
| <b>Outcome 1 – disease severity: odds of moderate/severe/critical/fatal COVID-19 (n = 323/905, 36%)</b>      |          |           |                  |             |           |                  |
| Age at admission <sup>1</sup>                                                                                | 1.02     | 1.1-1.03  | <b>&lt;0.001</b> | 1.02        | 1.01-1.03 | <b>&lt;0.001</b> |
| Male <sup>2</sup>                                                                                            | 2.20     | 1.65-2.94 | <b>&lt;0.001</b> | 2.02        | 1.51-2.73 | <b>&lt;0.001</b> |
| Immunocompromised <sup>3</sup>                                                                               | 2.18     | 1.55-3.07 | <b>&lt;0.001</b> | 2.36        | 1.65-3.38 | <b>&lt;0.001</b> |
| Unvaccinated <sup>4</sup>                                                                                    | 1.00     | 0.65-1.53 | 0.99             | -           | -         | -                |
| Boosted <sup>5</sup>                                                                                         | 1.25     | 0.92-1.70 | 0.16             | -           | -         | -                |
| Viral vector vaccination <sup>6</sup>                                                                        | 1.30     | 0.93-1.83 | 0.12             | -           | -         | -                |
| Vaccinated <2 months before admission <sup>7</sup>                                                           | 0.57     | 0.38-0.82 | <b>0.003</b>     | -           | -         | -                |
| Vaccinated <4 months before admission <sup>7</sup>                                                           | 1.01     | 0.71-1.42 | 0.98             | -           | -         | -                |
| Vaccinated <6 months before admission <sup>7</sup>                                                           | 1.18     | 0.74-1.90 | 0.50             | -           | -         | -                |
| <b>Outcome 2 – ICU admission: odds of admission or transferred to ICU due to COVID-19 (n = 68/905, 7.5%)</b> |          |           |                  |             |           |                  |
| Age at admission <sup>1</sup>                                                                                | 0.99     | 0.98-1.00 | 0.08             | 0.99        | 0.98-1.00 | 0.07             |
| Male <sup>2</sup>                                                                                            | 1.76     | 1.07-2.95 | <b>0.03</b>      | 1.72        | 1.03-2.92 | <b>0.04</b>      |
| Immunocompromised <sup>3</sup>                                                                               | 3.65     | 2.19-6.05 | <b>&lt;0.001</b> | 3.41        | 2.04-5.68 | <b>&lt;0.001</b> |
| Unvaccinated <sup>4</sup>                                                                                    | 0.99     | 0.42-2.03 | 0.98             | -           | -         | -                |
| Boosted <sup>5</sup>                                                                                         | 0.94     | 0.56-1.64 | 0.83             | -           | -         | -                |
| Viral vector vaccination <sup>6</sup>                                                                        | 1.18     | 0.63-2.12 | 0.59             | -           | -         | -                |
| Vaccinated <2 months before admission <sup>7</sup>                                                           | 0.97     | 0.48-1.86 | 0.94             | -           | -         | -                |
| Vaccinated <4 months before admission <sup>7</sup>                                                           | 0.86     | 0.47-1.64 | 0.63             | -           | -         | -                |
| Vaccinated <6 months before admission <sup>7</sup>                                                           | 0.93     | 0.43-2.32 | 0.86             | -           | -         | -                |
| <b>Outcome 3 –mortality: odds of in-hospital mortality related to COVID-19 (n= 58/905, 6.4%)</b>             |          |           |                  |             |           |                  |
| Age at admission <sup>1</sup>                                                                                | 1.04     | 1.02-1.06 | <b>&lt;0.001</b> | 1.05        | 1.03-1.07 | <b>&lt;0.001</b> |
| Male <sup>2</sup>                                                                                            | 2.24     | 1.29-3.98 | <b>0.005</b>     | 2.08        | 1.19-3.75 | <b>0.01</b>      |
| Immunocompromised <sup>3</sup>                                                                               | 2.56     | 1.46-4.42 | <b>&lt;0.001</b> | 3.47        | 1.90-6.30 | <b>&lt;0.001</b> |
| Unvaccinated <sup>4</sup>                                                                                    | 0.58     | 0.14-1.66 | 0.38             | -           | -         | -                |
| Boosted <sup>5</sup>                                                                                         | 1.08     | 0.55-2.25 | 0.83             | -           | -         | -                |
| Viral vector vaccination <sup>6</sup>                                                                        | 1.47     | 0.64-3.22 | 0.34             | -           | -         | -                |
| Vaccinated <2 months before admission <sup>7</sup>                                                           | 0.30     | 0.05-1.05 | 0.11             | -           | -         | -                |
| Vaccinated <4 months before admission <sup>7</sup>                                                           | 1.09     | 0.44-3.08 | 0.87             | -           | -         | -                |
| Vaccinated <6 months before admission <sup>7</sup>                                                           | 0.96     | 0.32-4.13 | 0.94             | -           | -         | -                |

**Supplemental Table S5. Mixed-model logistic regression analysis adult patients infected with Omicron comparing adult patients infected with Omicron and moderate/severe/critical/fatal COVID-19 (n=323) (i.e., excluding asymptomatic patients or patients with mild COVID-19 symptoms).** Covariates: 1. odds increase per year; 2. versus female; 3. versus non-immunocompromised; 4. versus any vaccination; 5. versus unvaccinated or (1/2) basic vaccination; 6. versus vaccinated with mRNA solely. 7. versus unvaccinated or vaccinated >2/>4/>6 months before admission. Abbreviations: OR, odds ratio; CI, confidence interval.

|                                                                                                             | Crude OR | 95% CI    | p value          | Adjusted OR | 95% CI    | p value          |
|-------------------------------------------------------------------------------------------------------------|----------|-----------|------------------|-------------|-----------|------------------|
| <b>Outcome 1 – disease severity: odds of critical/fatal COVID-19 (n=92/323, 28.5%)</b>                      |          |           |                  |             |           |                  |
| Age at admission <sup>1</sup>                                                                               | 1.01     | 0.99-1.02 | 0.32             | 1.02        | 1.00-1.03 | 0.06             |
| Male <sup>2</sup>                                                                                           | 1.60     | 0.96-2.68 | 0.07             | 1.63        | 0.98-2.76 | 0.06             |
| Immunocompromised <sup>3</sup>                                                                              | 2.12     | 1.24-3.58 | <b>0.005</b>     | 2.42        | 1.39-4.22 | <b>0.002</b>     |
| Unvaccinated <sup>4</sup>                                                                                   | 0.69     | 0.27-1.55 | 0.40             | -           | -         | -                |
| Boosted <sup>5</sup>                                                                                        | 0.89     | 0.50-1.59 | 0.68             | -           | -         | -                |
| Viral vector vaccination <sup>6</sup>                                                                       | 0.85     | 0.44-1.60 | 0.62             | -           | -         | -                |
| Vaccinated <2 months before admission <sup>7</sup>                                                          | 0.80     | 0.32-1.78 | 0.60             | -           | -         | -                |
| Vaccinated <4 months before admission <sup>7</sup>                                                          | 0.80     | 0.41-1.58 | 0.51             | -           | -         | -                |
| Vaccinated <6 months before admission <sup>7</sup>                                                          | 0.84     | 0.35-2.25 | 0.72             | -           | -         | -                |
| <b>Outcome 2 – ICU admission: odds of admission or transferred to ICU due to COVID-19 (n=68/323, 21.1%)</b> |          |           |                  |             |           |                  |
| Age at admission <sup>1</sup>                                                                               | 0.96     | 0.95-0.98 | <b>&lt;0.001</b> | 0.97        | 0.95-0.98 | <b>&lt;0.001</b> |
| Male <sup>2</sup>                                                                                           | 1.06     | 0.61-1.86 | 0.84             | 0.97        | 0.54-1.75 | 0.93             |
| Immunocompromised <sup>3</sup>                                                                              | 1.79     | 0.95-3.35 | 0.07             | 1.96        | 1.06-3.57 | <b>0.03</b>      |
| Unvaccinated <sup>4</sup>                                                                                   | 0.99     | 0.40-2.19 | 0.97             | -           | -         | -                |
| Boosted <sup>5</sup>                                                                                        | 0.77     | 0.43-1.41 | 0.39             | -           | -         | -                |
| Viral vector vaccination <sup>6</sup>                                                                       | 0.97     | 0.50-1.85 | 0.94             | -           | -         | -                |
| Vaccinated <2 months before admission <sup>7</sup>                                                          | 1.65     | 0.75-3.45 | 0.20             | -           | -         | -                |
| Vaccinated <4 months before admission <sup>7</sup>                                                          | 0.83     | 0.43-1.67 | 0.59             | -           | -         | -                |
| Vaccinated <6 months before admission <sup>7</sup>                                                          | 0.80     | 0.33-2.13 | 0.62             | -           | -         | -                |
| <b>Outcome 3 – mortality: odds of in-hospital mortality related to COVID-19 (n=58/323, 18.0%)</b>           |          |           |                  |             |           |                  |
| Age at admission <sup>1</sup>                                                                               | 1.04     | 1.02-1.06 | <b>0.001</b>     | 1.06        | 1.03-1.09 | <b>&lt;0.001</b> |
| Male <sup>2</sup>                                                                                           | 1.42     | 0.78-2.63 | 0.25             | 1.63        | 0.87-3.13 | 0.13             |
| Immunocompromised <sup>3</sup>                                                                              | 1.79     | 0.95-3.35 | 0.07             | 3.13        | 1.52-6.62 | <b>0.002</b>     |
| Unvaccinated <sup>4</sup>                                                                                   | 0.56     | 0.13-1.66 | 0.35             | -           | -         | -                |
| Boosted <sup>5</sup>                                                                                        | 0.92     | 0.44-1.98 | 0.82             | -           | -         | -                |
| Viral vector vaccination <sup>6</sup>                                                                       | 1.25     | 0.53-2.83 | 0.60             | -           | -         | -                |
| Vaccinated <2 months before admission <sup>7</sup>                                                          | 0.44     | 0.07-1.59 | 0.28             | -           | -         | -                |
| Vaccinated <4 months before admission <sup>7</sup>                                                          | 1.09     | 0.42-3.17 | 0.87             | -           | -         | -                |
| Vaccinated <6 months before admission <sup>7</sup>                                                          | 0.84     | 0.26-3.77 | 0.80             | -           | -         | -                |

**Supplemental Table S6. Differences in total hospital length-of-stay (days) in adult patients infected with Omicron and moderate/severe/critical/fatal COVID-19 (n=323), dependent on COVID-19 symptoms and immune status or vaccination status at admission.**

|                       | Hospital length-of-stay (days)           |                     |                      |                      |                                     |
|-----------------------|------------------------------------------|---------------------|----------------------|----------------------|-------------------------------------|
|                       | Worst COVID-19 symptoms during admission |                     |                      |                      | All symptomatic patients<br>N = 323 |
|                       | Moderate<br>N = 89                       | Severe<br>N = 142   | Critical<br>N = 34   | Fatal<br>N = 58      |                                     |
| Immune status         |                                          |                     |                      |                      |                                     |
| Immunocompromised     | 5 (4-7)<br>N = 29                        | 8 (6-17)<br>N = 30  | 42 (18-67)<br>N = 16 | 18 (6-36)<br>N = 23  | 9 (5-25)<br>N = 184                 |
| Non-immunocompromised | 10 (5-19)<br>N = 60                      | 8 (5-15)<br>N = 112 | 17 (12-38)<br>N = 18 | 11 (5-17)<br>N = 35  | 10 (5-18)<br>N = 657                |
| <i>p-value</i>        | <b>0.005</b>                             | 0.96                | 0.18                 | 0.09                 | 0.75                                |
|                       |                                          |                     |                      |                      |                                     |
| Vaccination status    |                                          |                     |                      |                      |                                     |
| Unvaccinated          | 7 (3-34)<br>N= 11                        | 8 (4-18)<br>N = 19  | 39 (24-56)<br>N = 4  | 7 (6-12)<br>N = 3    | 8 (4-28)<br>N = 37                  |
| Vaccinated            | 7 (4-14)<br>N = 74                       | 8 (6-16)<br>N = 117 | 21 (12-59)<br>N = 30 | 12 (5-26)<br>N = 35  | 9 (5-18)<br>N = 256                 |
| <i>p-value</i>        | 0.57                                     | 0.76                | 0.72                 | 0.63                 | 0.82                                |
|                       |                                          |                     |                      |                      |                                     |
| Unboosted             | 4 (2-17)<br>N = 26                       | 7 (4-15)<br>N = 39  | 29 (8-63)<br>N = 11  | 10 (5-14)<br>N = 12  | 8 (4-17)<br>N = 88                  |
| Boosted               | 8 (5-14)<br>N = 59                       | 8 (5-12)<br>N = 97  | 22 (14-59)<br>N = 23 | 13 (5-26)<br>N = 26  | 10 (6-19)<br>N = 205                |
| <i>p-value</i>        | 0.08                                     | 0.08                | 0.77                 | 0.71                 | <b>0.03</b>                         |
|                       |                                          |                     |                      |                      |                                     |
| Viral vector          | 8 (6-18)<br>N = 22                       | 9 (6-16)<br>N = 40  | 35 (12-57)<br>N = 7  | 16 (11-39)<br>N = 10 | 10 (6-19)<br>N = 79                 |
| mRNA                  | 6 (4-13)<br>N = 51                       | 8 (6-14)<br>N = 73  | 27 (21-77)<br>N = 23 | 9 (3-27)<br>N = 17   | 8 (4-17)<br>N = 164                 |
| <i>p-value</i>        | 0.25                                     | 0.39                | 0.29                 | 0.42                 | 0.12                                |

Supplemental Figure S1. Number of newly hospitalized patients with positive SARS-CoV-2 screening, divided by age, date of admission and VOC. A. Children (<18 years old); B. Adults (≥18 years old).

A

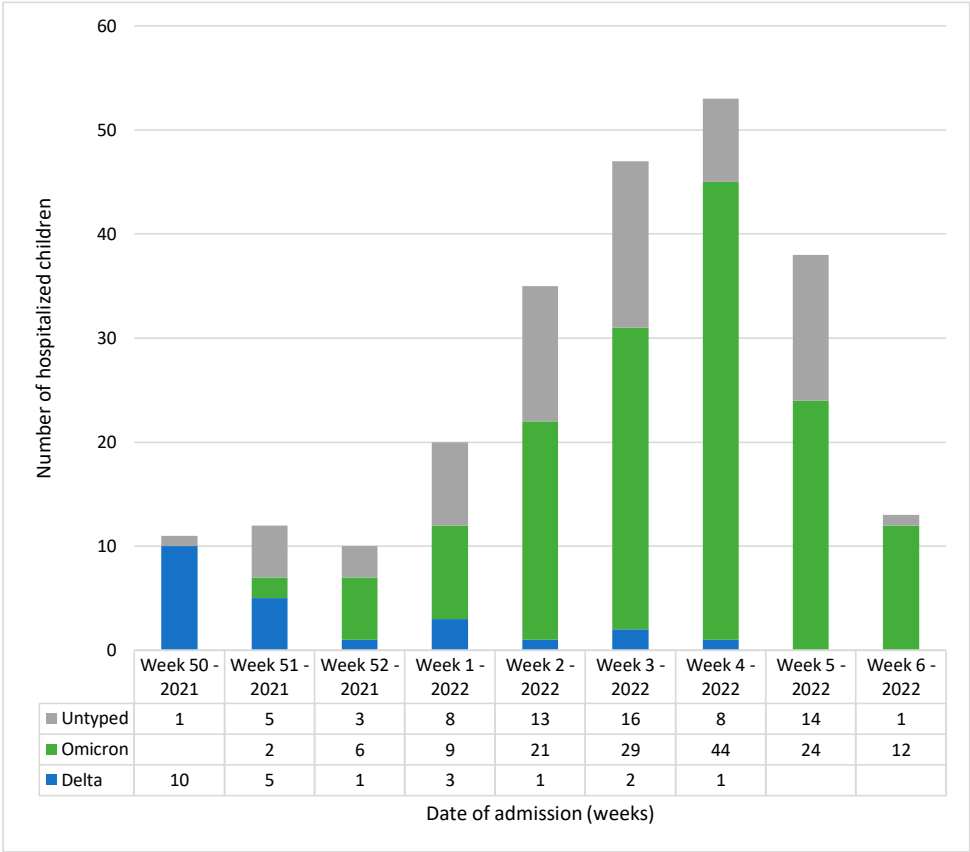

B

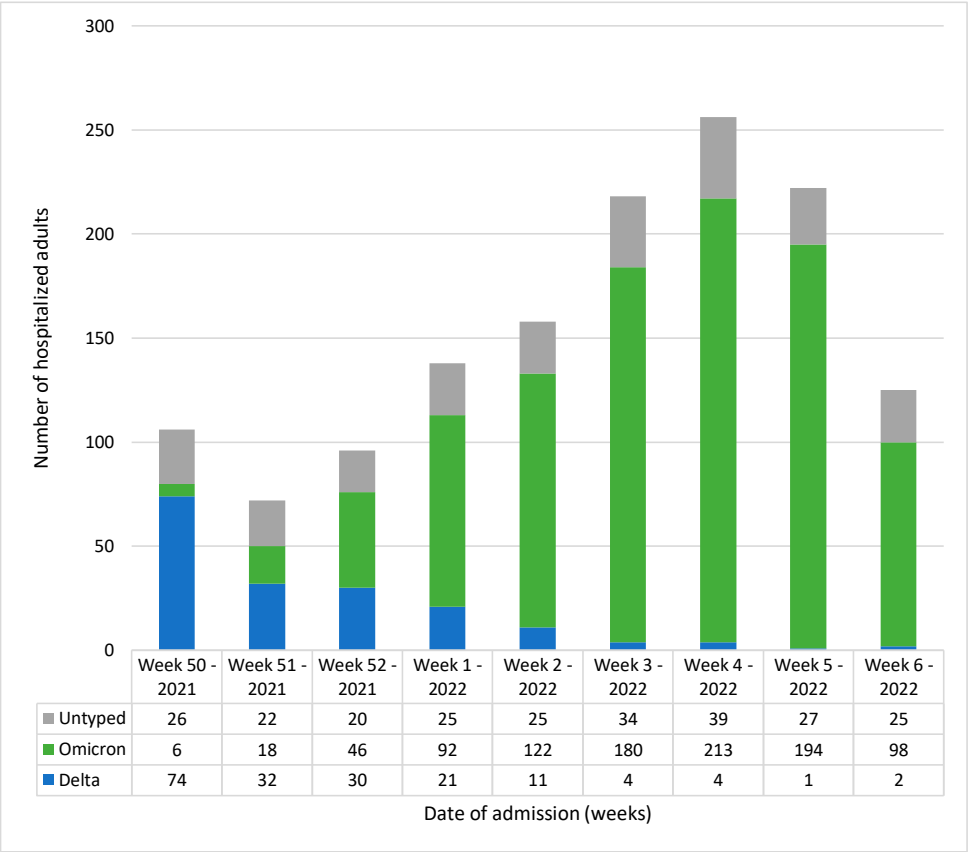



Supplemental Figure S2. Number of newly hospitalized patients with positive SARS-CoV-2 screening, divided by age and classification during hospitalization. A. Children (<18 years old); B. Adults (≥18 years old).

A

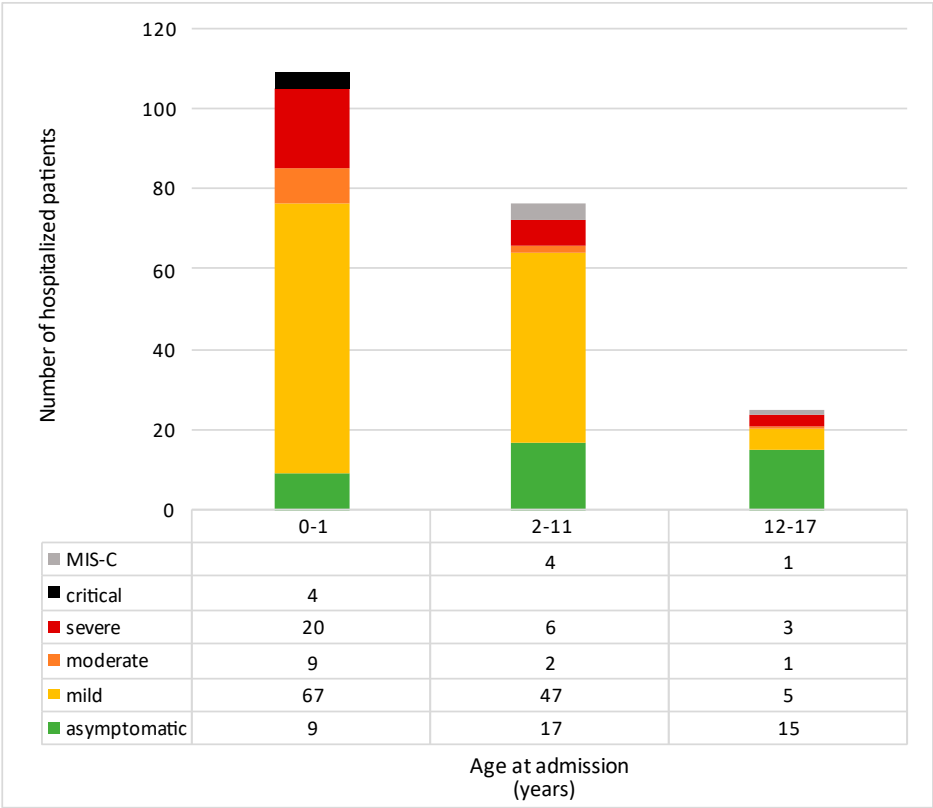

B

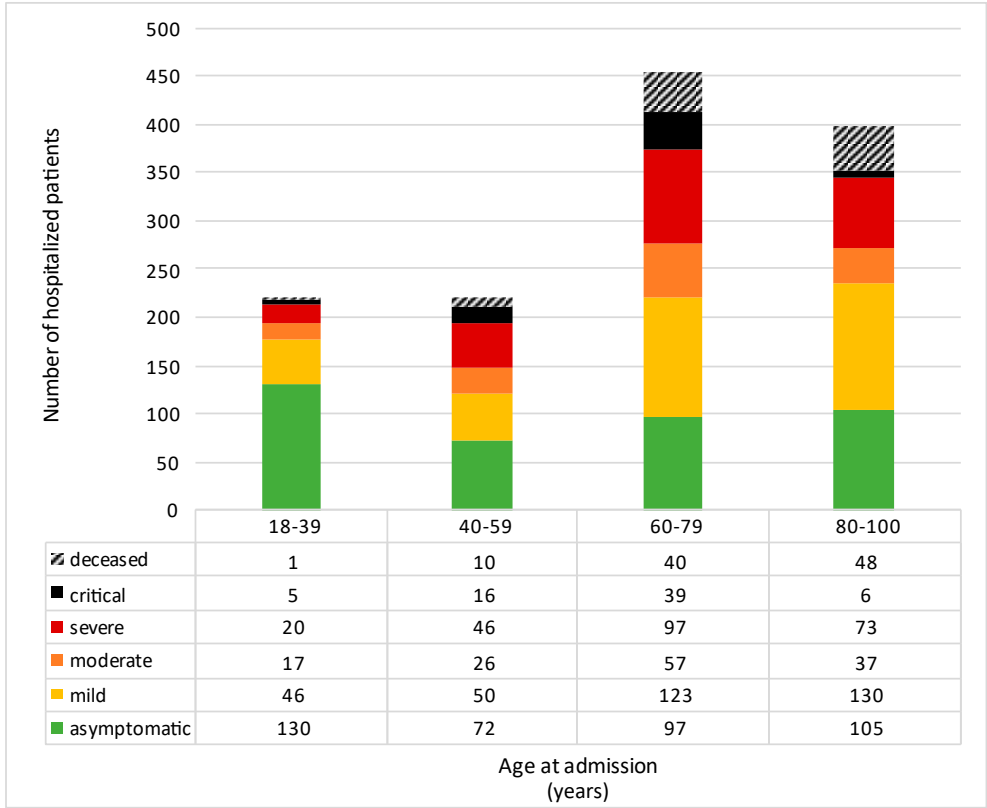

## Supplemental Materials & Methods

### A. Classification COVID-19 symptoms

To classify patients based on COVID-19 symptoms, NIH guidelines [1] were used as symptom definition:

- 1) asymptomatic [or presymptomatic] *i.e.*, no symptoms that are consistent with COVID-19
- 2) mild illness *i.e.*, any of the various signs and symptoms of COVID-19 (e.g., fever, cough, sore throat, malaise, headache, muscle pain, nausea, vomiting, diarrhea, loss of taste and smell) but who do not have shortness of breath, dyspnea, or abnormal chest imaging
- 3) moderate illness *i.e.*, evidence of lower respiratory disease during clinical assessment or imaging and who have an oxygen saturation (SpO<sub>2</sub>)  $\geq 94\%$  on room air at sea level
- 4) severe illness *i.e.*, SpO<sub>2</sub>  $< 94\%$  on room air at sea level, a ratio of arterial partial pressure of oxygen to fraction of inspired oxygen (PaO<sub>2</sub>/FiO<sub>2</sub>)  $< 300$  mm Hg, a respiratory rate  $> 30$  breaths/min, or lung infiltrates  $> 50\%$ . Remark: A patient can only be classified as "severe illness" if he/she also has clinical signs of lower respiratory tract infection (via clinical examination or via imaging = definition of "moderate illness"). So, individuals who have SpO<sub>2</sub>  $< 94\%$  on room air at sea level but no evidence of lower respiratory disease are NOT classified as "severe illness"
- 5) critical illness *i.e.*, respiratory failure, septic shock, and/or multiple organ dysfunction. Remark: a patient who is admitted with septic shock with no respiratory clinic and who is clearly NOT linked to the (accidentally found) positive SARS-CoV-2 screening is NOT classified as "critical illness"
- 6) MIS-C *i.e.*, multisystem inflammatory syndrome in children associated with COVID-19 (case definition: CDC [2]).
- 7) fatal: deceased due to COVID-19. Remark: a patient who dies where the (incidentally found) positive SARS-CoV-2 screening is clearly unrelated to the death is not classified as "deceased due to COVID-19. However, from the slightest suspicion that COVID-19 may have contributed to the death of the patient, the patient is classified as "deceased due to COVID-19"

## **B. Classification immune status**

To classify patients as immunocompromised, CDC criteria [3] for moderately or severely immunocompromised people are applied:

- 1) a patient receiving active cancer treatment for tumors or cancers of the blood
- 2) a patient who received an organ transplant and is taking medicine to suppress the immune system
- 3) a patient who received a stem cell transplant within the last 2 years or is taking medicine to suppress the immune system
- 4) a patient with moderate or severe primary immunodeficiency (such as DiGeorge syndrome, Wiskott-Aldrich syndrome – see categorization Inborn errors of immunity (primary immunodeficiencies), UpToDate 2022 [4])
- 5) a patient with advanced or untreated HIV infection
- 6) a patient with active treatment with high-dose corticosteroids (defined as a daily intake of  $\geq 15$ mg of prednisolone or its equivalent for  $>2$  weeks [5]) or other drugs that may suppress your immune response

[1] COVID-19 Treatment Guidelines Panel. Coronavirus Disease 2019 (COVID-19) Treatment Guidelines. National Institutes of Health. Available at <https://www.covid19treatmentguidelines.nih.gov/overview/clinical-spectrum/>. Accessed January 10, 2022

[2] CDC Health Alert Network. MIS-C associated with COVID-19. Available via <https://emergency.cdc.gov/han/2020/han00432.asp>. Accessed February 10, 2022

[3] CDC. COVID-19 Vaccines for Moderately or Severely Immunocompromised People. Available via <https://www.cdc.gov/coronavirus/2019-ncov/vaccines/recommendations/immuno.html>. Accessed February 9, 2022

[4] Sullivan KE, Jyonouchi SC. Inborn errors of immunity (primary immunodeficiencies): Classification (UpToDate, last updated December 15, 2021)). Available via <https://www.uptodate.com/contents/inborn-errors-of-immunity-primary-immunodeficiencies->

[5] Shroff A, Mertz D. Infectious Diseases Risk Whole in Chronic, High-Dose Corticosteroids. Canadian Journal of General Internal Medicine;2017;12(1):10-13

### C. Classification vaccination status

Vaccination status as registered at time of admission were registered, including date of last administrated vaccine. Abbreviations: Pfizer vaccine, BNT162b2 (COMIRNATY), Pfizer, Inc., and BioNTech [mRNA vaccine]; Moderna vaccine, mRNA-1273 (Spikevax), ModernaTX, Inc. [mRNA vaccine]; AstraZeneca vaccine, ChAdOx1-S [recombinant] (Vaxzevria), Oxford/AstraZeneca [viral vector vaccine]; J&J vaccine, JNJ-78436735, Janssen Pharmaceuticals Companies of Johnson & Johnson [viral vector vaccine]

- 1) Unvaccinated
- 2) 1x Pfizer vaccine (1/2 basic vaccination, mRNA vaccination)
- 3) 2x Pfizer vaccine (basic vaccination, mRNA vaccination)
- 4) 3x Pfizer vaccine (boosted, mRNA vaccination)
- 5) 2x Pfizer vaccine + 1x Moderna vaccine (boosted, mRNA vaccination)
- 6) 1x Moderna vaccine (1/2 basic vaccination, mRNA vaccination)
- 7) 2x Moderna vaccine (basic vaccination, mRNA vaccination)
- 8) 3x Moderna vaccine (boosted, mRNA vaccination)
- 9) 2x Moderna vaccine + 1x Pfizer vaccine (boosted, mRNA vaccination)
- 10) 1x AstraZeneca vaccine (1/2 basic vaccination, viral vector vaccination)
- 11) 2x AstraZeneca vaccine (basic vaccination, viral vector vaccination)
- 12) 2x AstraZeneca vaccine + 1x Pfizer vaccine (boosted, counted as viral vector vaccination)
- 13) 2x AstraZeneca vaccine + 1x Moderna vaccine (boosted, counted as viral vector vaccination)
- 14) 1x J&J vaccine (basic vaccination, viral vector vaccination)
- 15) 1x J&J vaccine + 1x Pfizer vaccine (boosted, counted as viral vector vaccination)
- 16) 1x J&J vaccine + 1x Moderna vaccine (boosted, counted as viral vector vaccination)
- 17) ½ basic vaccination, vaccines unknown
- 18) Basic vaccination, vaccines unknown
- 19) Boosted, vaccines unknown
- 20) Vaccination status unknown

D. Used PCR, WGS and serology analyzers and assay in the participating centers. Abbreviations: N.A., not applicable

| Laboratory                                         | PCR analyses                                                                                                                                                                                                                                                                                                   | WGS analyses                                                                                                                                     | Marker PCR analyses                                                                                                                                | Serology analyses                                                                                       |
|----------------------------------------------------|----------------------------------------------------------------------------------------------------------------------------------------------------------------------------------------------------------------------------------------------------------------------------------------------------------------|--------------------------------------------------------------------------------------------------------------------------------------------------|----------------------------------------------------------------------------------------------------------------------------------------------------|---------------------------------------------------------------------------------------------------------|
| University Hospitals Leuven                        | Analyzer: Panther (Hologic); KingFisher + Quantstudio 7 flex (ThermoFisher); Alinity m (Abbott); GeneXpert (Cepheid)<br>Assay: MVP II nuclear extraction followed by TaqPath COVID-19 RT PCR (Thermo Fisher); Aptima SARS-CoV-2 (Hologic); Alinity m SARS-CoV-2 (Abbott molecular); Xpert SARS-CoV-2 (Cepheid) | Analyzer: GridION (Oxford Nanopore Technologies)<br>Assay: COVID Midi kit (C19MIDI; Oxford Nanopore Technologies) / Artic nCoV-2019 last version | Analyzer: KingFisher + Quantstudio 5/7 flex (ThermoFisher)<br>Assay: MVP II nuclear extraction followed by Taqman™ SARS-CoV-2 Mutation Panel Assay | Analyzer: Architect (Abbott)<br>Assay: SARS-CoV-2 IgG II Quant (anti-S) & SARS-CoV-2 IgG assay (anti-N) |
| University Hospitals Brussel                       | Analyzer: AltoStar® (Altona Diagnostics); GeneXpert (Cepheid)<br>Assay: Altostar® SARS-CoV-2 RT- kit 1.5 (Altona Diagnostics); Xpert SARS-CoV-2 (Cepheid)                                                                                                                                                      | Analyzer: GridION (Oxford Nanopore Technologies)<br>Assay: 1200bp amplicon “midnight” primer set, using Nanopore Rapid Barcoding Kit             | N.A.                                                                                                                                               | N.A.                                                                                                    |
| ZNA Antwerp                                        | Analyzer: Cobas 6800 (Roche)<br>Assay: RT-PCR                                                                                                                                                                                                                                                                  | Analyzer: MiSeq (Illumina)<br>Assay: AmpliSeq SARS-CoV-2                                                                                         | Analyzer: KingFisher + Quantstudio 5 (ThermoFisher)<br>Assay: MVP II nuclear extraction followed by TaqPath COVID-19 RT PCR (Thermo Fisher)        | N.A.                                                                                                    |
| OLV Hospital Aalst                                 | Analyzer: Starlet & Biorad<br>Assay: In-house PCR (N1 & E-gene)                                                                                                                                                                                                                                                | Analyzer: MinION (Oxford Nanopore Technologies)                                                                                                  | Assay: In-house PCR assays (multiplex)                                                                                                             | Analyzer: Cobas (Roche)                                                                                 |
| Laboratoire Hospitalier Universitaire de Bruxelles | Analyzer: Alinity m (Abbott); Abbott-M2000 (Abbott)<br>Assay: Alinity m SARS-CoV-2; Abbott Real Time SARS-CoV-2                                                                                                                                                                                                | Analyzer: N.A. (Oxford Nanopore Technologies)<br>Assay: Artic nCoV-2019 last version                                                             | N.A.                                                                                                                                               | Analyzer: Liaison XL<br>Assay: Liaison SARS-CoV-2 Trimerics IgG                                         |
| AZ Sint-Jan Brugge-Oostende                        | Analyzer: GeneXpert (Cepheid); Cobas 6800 (Roche)<br>Assay: Xpert SARS-CoV-2 (Cepheid); Cobas® SARS-CoV-2 (Roche)                                                                                                                                                                                              | Analyzer: MiSeq (Illumina)<br>Assay: QIAseq® DIRECT SARS-CoV-2                                                                                   | Analyzer: ViiA7<br>Assay: Taqman™ SARS-CoV-2 Mutation Panel Assay                                                                                  | Analyzer: Architect (Abbott)<br>Assay: SARS-CoV-2 IgG II Quant (anti-S) & SARS-CoV-2 IgG assay (anti-N) |

|                              |                                                                                                                                   |                                                          |                                                                                                                                                  |                                                              |
|------------------------------|-----------------------------------------------------------------------------------------------------------------------------------|----------------------------------------------------------|--------------------------------------------------------------------------------------------------------------------------------------------------|--------------------------------------------------------------|
| Jessa Hospital Hasselt       | Analyzers: Alinity M (Abbott), GeneXpert GX16 (Cepheid), Cobas LIAT System (Roche), Luminex Aries (Thermo Fisher), M2000 (Abbott) | Analyzer: MiSeq (Illumina)<br>Assay: AmpliSeq SARS-CoV-2 | N.A.                                                                                                                                             | Analyzer: Alinity I (Abbott)<br>Assay: SARS-CoV-2 IgG anti-S |
| University Hospitals Antwerp | Analyzer: BD MAX System (BD); GeneXpert (Cepheid)<br>Assay: SARS-CoV-2 for BD MAX (BD); Xpert SARS-CoV-2 (Cepheid)                | Analyzer: NextSeq (Illumina)<br>Assay: COVIDSeq          | Analyzer: KingFisher + Quantstudio 7 flex (ThermoFisher)<br>Assay: MVP II nuclear extraction followed by TaqPath COVID-19 RT PCR (Thermo Fisher) | N.A.                                                         |
